# Supplementary material for: A vapor-phase-assisted growth route for large-scale uniform deposition of MoS2 monolayer films
Source: Royal Society of Chemistry journal article supplement (doi:10.1039/c8ra08626e), 2018-12-21
Supplement: c8ra08626e1.pdf [file c8ra08626e1.pdf]

## Supporting Information

### A vapor-phase-assisted growth route for large-scale uniform deposition of MoS<sub>2</sub> monolayer films

Devendra Pareek,<sup>†1\*</sup>, Marco A. Gonzalez,<sup>†1</sup>, Jannik Zohrabian<sup>1</sup>, Mohamed H. Sayed<sup>1,3</sup>,  
Volker Steenhoff<sup>2</sup>, Colleen Lattyak<sup>2</sup>, Martin Vehse<sup>2</sup>, Carsten Agert<sup>2</sup>, Jürgen Parisi<sup>1</sup>,  
Sascha Schäfer<sup>1</sup>, Levent Gütay<sup>1</sup>

<sup>1</sup>Institute of Physics, Carl von Ossietzky University of Oldenburg, Oldenburg, Germany

<sup>2</sup>DLR Institute of Networked Energy Systems, Oldenburg, Germany

<sup>3</sup>Current address: Solid State Physics Department, National Research Centre, 12311 Dokki, Giza, Egypt

<sup>†</sup>Authors contributed equally to this work

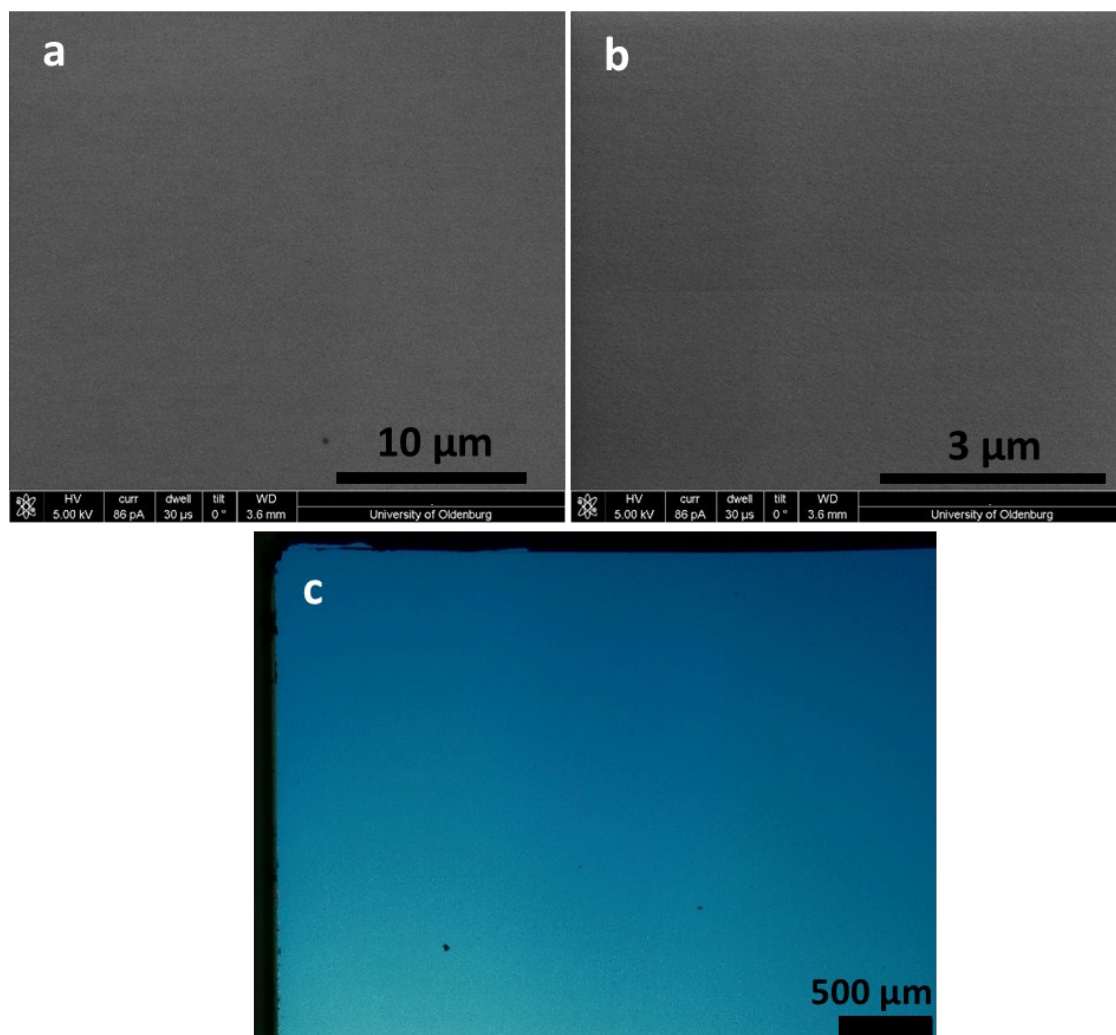

**Fig. S1:** SEM micrographs (a,b) and an optical overview image (c) of the sample processed at 950 °C. No visible structures are observable, indicating a homogenous deposition on the substrate with no discernible features on length scales larger than 100 nm.
